# Supplementary material
Source: MDPI journal article supplement (https://www.mdpi.com/2073-4352/14/3/236)
Supplement: s1 [file s1 › crystals-2820453-supplementary.pdf]

## Potentials and Limits of PMN-PT and PIN-PMN-PT single crystals for Pyroelectric Energy Harvesting

Mohammed Es-Souni\*, Chair: Institute for Materials & Surface Technology, honorary member of Kiel University of Applied Sciences

mohammed.es-souni@fh-kiel.de

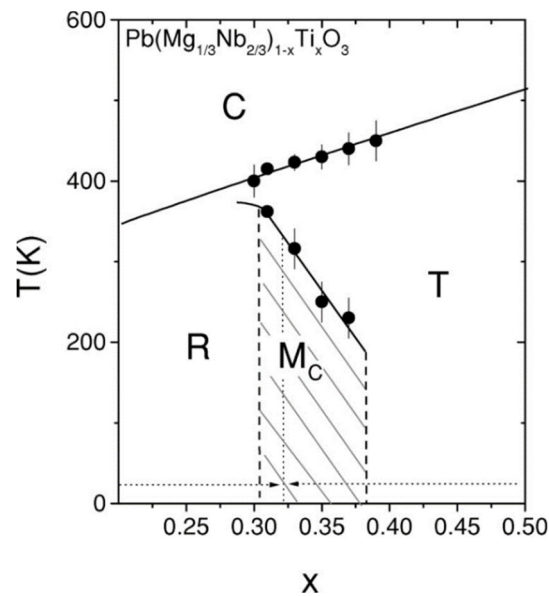

Figure S1: the PMN-xPT phase diagram showing the fields of the different structures, the morphotropic phase boundary (MPB, hatched area), and the phase transition temperatures as a function of the PT content. R is the rhombohedral,  $M_c$  the monoclinic, T the tetragonal and C the cubic phase structure, after Noheda et al.[7].

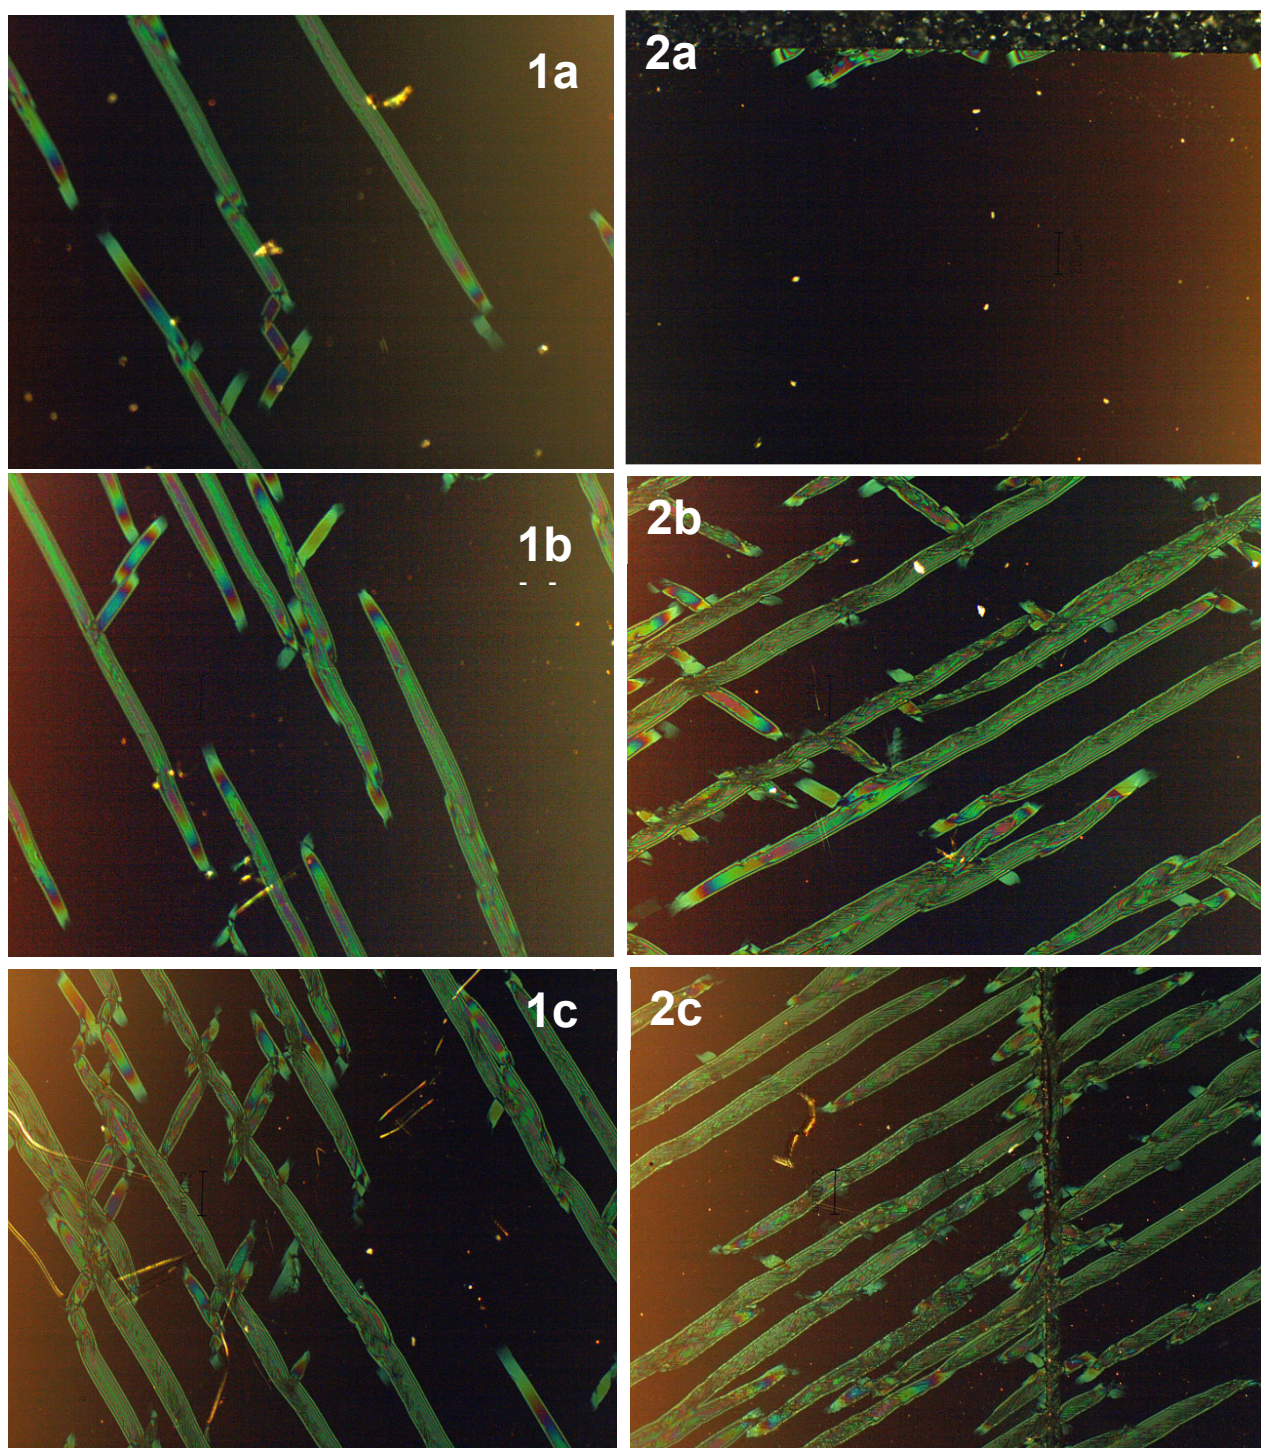

Figure S2: polarization microscopy images of the  $\langle 111 \rangle$  25PIN-42PMN-33PT:Mn crystal samples corresponding to Table 4.

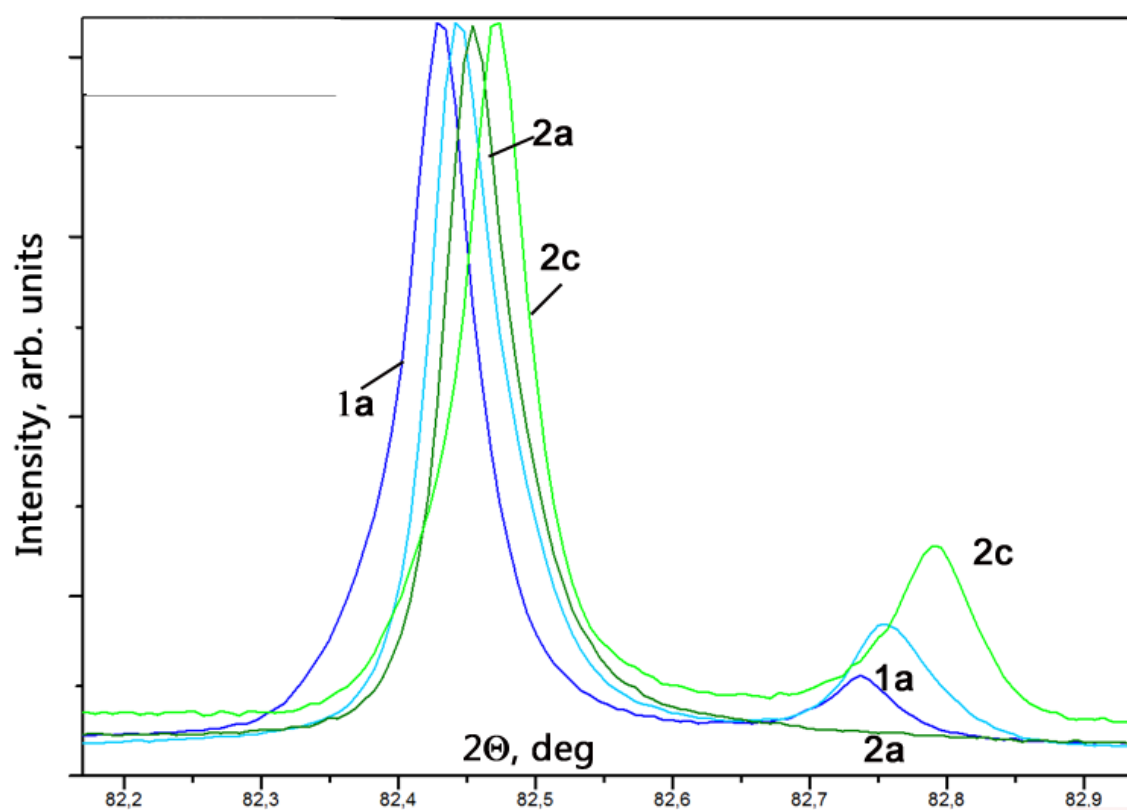

Figure S3: the <222> reflections corresponding to the samples in Figure.1
